# Supplementary material for: Inhibition of Caspase 1 Reduces Blood Pressure, Cytotoxic NK Cells, and Inflammatory T-Helper 17 Cells in Placental Ischemic Rats
Source: MDPI journal article supplement (doi:10.3390/ijms25020863), 2024-01-10
Supplement: s1 [file s1]

**S1**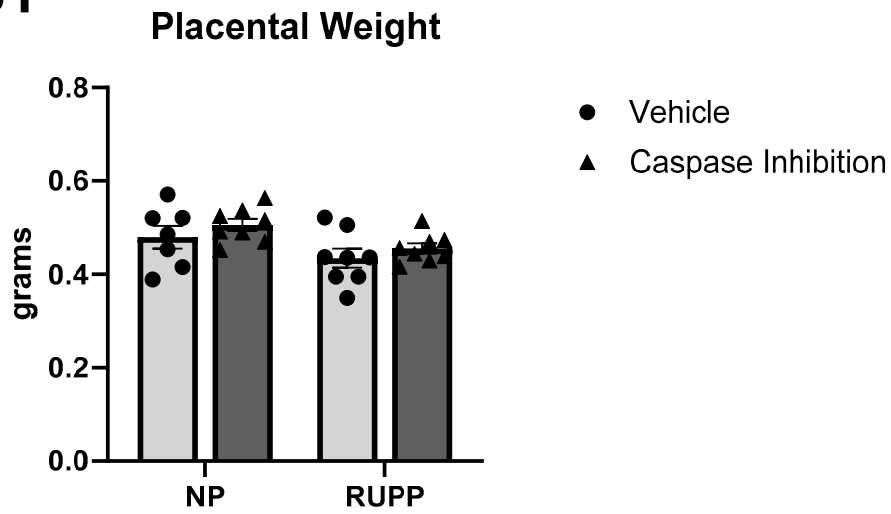

Supplemental Figure S1: Caspase 1 inhibition has no effect on placental weight in NP or RUPP rats. Data presented as Mean  $\pm$  SEM.

**S2**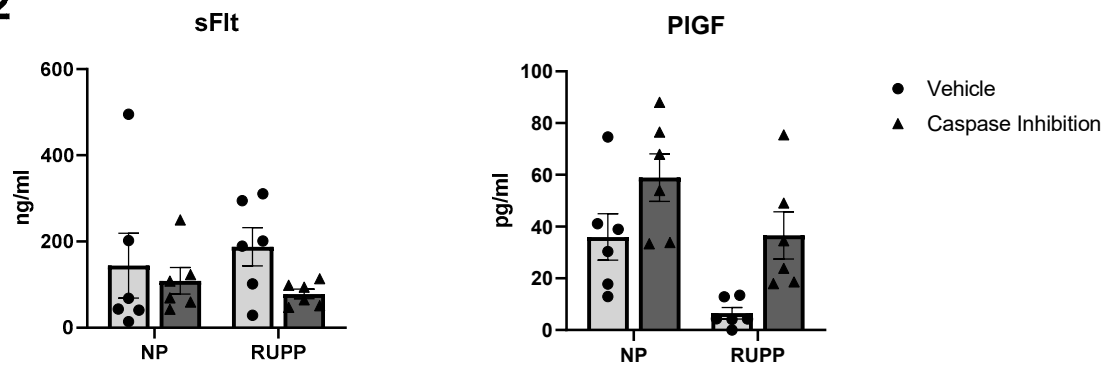

Supplemental Figure S2: No Differences were observed in sFlt or PlGF individually in NP or RUPP rats. Treatment with VX-765 also had no effect. Data are presented as Mean  $\pm$  SEM.
